# Supplementary material for: Design of Liposomes Carrying HelixComplex Snail Mucus: Preliminary Studies
Source: MDPI journal article supplement (doi:10.3390/molecules26164709), 2021-08-04
Supplement: s1 [file s1]

## Supplementary Materials

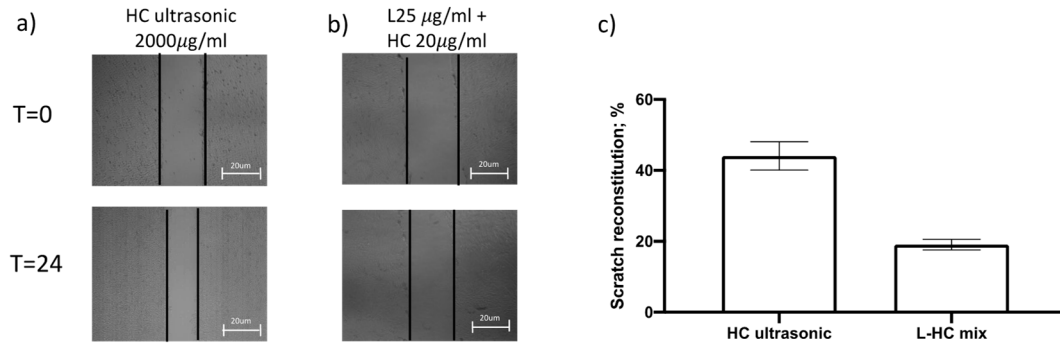

**Figure S1.** Evaluation of ultrasonicated HC 2000 µg/mL (a) and L + HC mixture (L 25 µg/mL + HC 20 µg/mL) (b) treatment on wound healing recovery in MRC-5 cells with images and graphical representation (c) at the indicated time points. Data are the mean % of three independent experiments  $\pm$  SD.

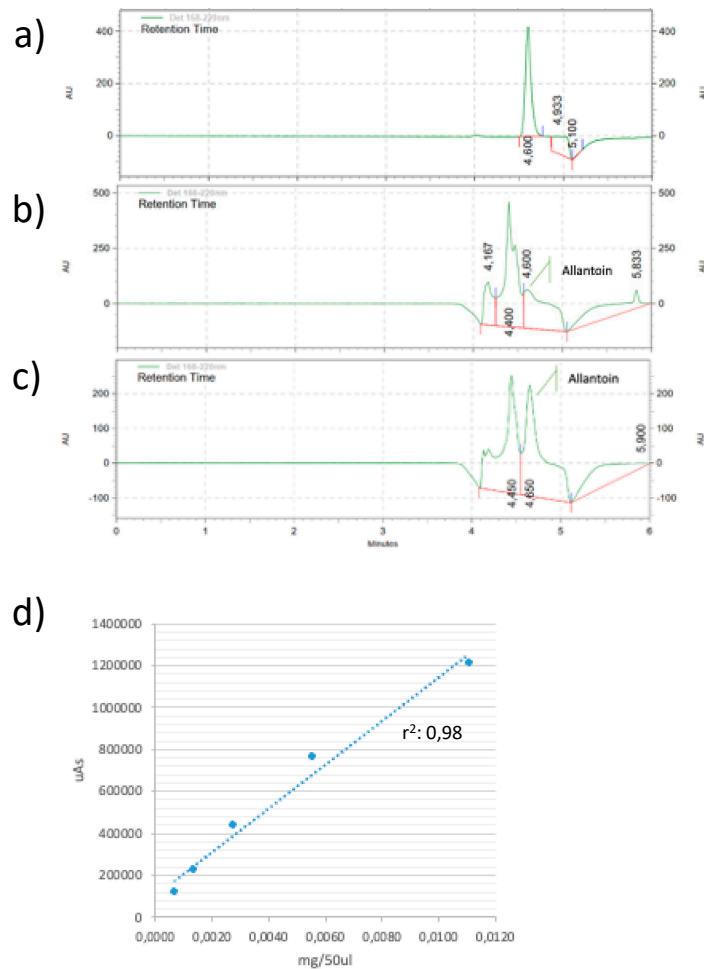

**Figure S2.** Evaluation of HC encapsulation efficacy (EE%) into LHC by HPLC analysis. (a) allantoin standard solution (retention time 4.6 min); (b) filtered LHC, the 4.6 min peak corresponds to allantoin while the others are related to the other HC components, such as glycolic acid; (c) spiked chromatogram of filtered LHC; (d) allantoin standard curve. AU: absorbance; uAs: unit of absorbance.
